# Supplementary material for: Dental Awareness and Barriers in Reducing the Risk of Medication-related Osteonecrosis of the Jaw (MRONJ) Among Non-head and Neck Cancer Patients
Source: Research Square preprint supplement (doi:10.21203/rs.3.rs-1117364/v1), 2022-01-03
Supplement: Supplementary file 1 [file 45f452a8375840f15bf147c1.docx]

**APPENDICES**

**A. Questionnaire**

Introduction

MRONJ is an adverse drug reaction consisting of progressive bone destruction in the maxillofacial region due to exposure to anti-resorptive and/or anti-angiogenic medications.

Patient’s information

| Patient’s RN: | Age: | | Gender: | | | Date: |
| --- | --- | --- | --- | --- | --- | --- |
| Cancer information: (organ/stage) |  | | | | | |
| Cancer treatment |  | Radiation | |  | Target/Immuno therapy | |
|  |  | Chemotherapy | |  | Antiresorptive drug | |

1. Are you aware that you are going to receive zoledronate/denosumab?

- Yes
- No

1. Does your doctor mention about the risks of taking this drug?

- Yes, please explain in detail:

___________________________________________________________

- No

1. Are you aware that you need to visit a dentist before the drug therapy?

- Yes
- No

1. Does your doctor suggest or refer you to receive a dental assessment prior to starting one of these drugs?

- Yes
- No

1. How frequent do you visit your dentist?

- Regular attendee (how frequent: ______________)
- Symptomatic attendee

1. When was your last visit to dental clinic and what was the procedure done?

- Less 6 months ago, specify procedure: __________________________
- Less than 1 year ago, specify procedure: __________________________
- More than 1 year ago, specify procedure: __________________________

1. Do you think it is important to do a dental check-up before starting one of these drugs?

- Yes
- No

1. From Q7, if you answered yes, what is your attitude towards receiving a dental check-up before starting one of these drugs? (choose 1 answer)
   - I already went for dental check-up prior starting bisphosphonates.

- I will go for dental check-up soon.
- I am ok either to go for dental check-up or not.
- I want to go for dental check-up but I am unable to do so due to some reasons.
- I feel there is no need for me to go for dental check-up.
  - Others, specify: ________________

1. If you haven’t gone to dental check-up, what is the reason? (more than 1 answer is allowed)

- I feel that my cancer matters more than my oral health.
- My doctor didn’t mention about this to me.
- I don’t think dental check-up is necessary.
- I am lazy to go for dental check-up.
  - Dental care is too expensive.
  - No transport to dental clinics.
  - Dental treatments are painful.
- My family doesn’t support me to go for dental check-up.
- Others, specify:____________________________________________

1. If we are able to arrange for a free dental screening, will you be interested to attend?

- Yes
- No

**B. Sample size calculation**
